# Supplementary material for: Marine Derived Hamacanthins as Lead for the Development of Novel PDGFRβ Protein Kinase Inhibitors
Source: MDPI journal article supplement (doi:10.3390/md11093209), 2013-08-26
Supplement: s2 [file s2]

marinedrugs-11-03209-s001.mol
  ChemDraw12021317092D

 27 31  0  0  0  0  0  0  0  0999 V2000
   -3.7023    0.8887    0.0000 C   0  0  0  0  0  0  0  0  0  0  0  0
   -3.7023    0.0637    0.0000 C   0  0  0  0  0  0  0  0  0  0  0  0
   -2.9878   -0.3488    0.0000 C   0  0  0  0  0  0  0  0  0  0  0  0
   -2.2734    0.0637    0.0000 C   0  0  0  0  0  0  0  0  0  0  0  0
   -2.2734    0.8887    0.0000 C   0  0  0  0  0  0  0  0  0  0  0  0
   -2.9878    1.3012    0.0000 C   0  0  0  0  0  0  0  0  0  0  0  0
   -2.8163   -1.1558    0.0000 N   0  0  0  0  0  0  0  0  0  0  0  0
   -1.9958   -1.2420    0.0000 C   0  0  0  0  0  0  0  0  0  0  0  0
   -1.6603   -0.4884    0.0000 C   0  0  0  0  0  0  0  0  0  0  0  0
   -0.9458   -0.0759    0.0000 C   0  0  0  0  0  0  0  0  0  0  0  0
   -0.2313   -0.4884    0.0000 N   0  0  0  0  0  0  0  0  0  0  0  0
    0.4832   -0.0759    0.0000 C   0  0  0  0  0  0  0  0  0  0  0  0
    0.4832    0.7491    0.0000 C   0  0  0  0  0  0  0  0  0  0  0  0
   -0.2313    1.1616    0.0000 N   0  0  0  0  0  0  0  0  0  0  0  0
   -0.9458    0.7491    0.0000 C   0  0  0  0  0  0  0  0  0  0  0  0
    1.1976   -0.4884    0.0000 C   0  0  0  0  0  0  0  0  0  0  0  0
    1.2839   -1.3088    0.0000 C   0  0  0  0  0  0  0  0  0  0  0  0
    2.0908   -1.4804    0.0000 N   0  0  0  0  0  0  0  0  0  0  0  0
    2.5033   -0.7659    0.0000 C   0  0  0  0  0  0  0  0  0  0  0  0
    1.9513   -0.1528    0.0000 C   0  0  0  0  0  0  0  0  0  0  0  0
   -1.5292    1.3325    0.0000 O   0  0  0  0  0  0  0  0  0  0  0  0
    3.3103   -0.5944    0.0000 C   0  0  0  0  0  0  0  0  0  0  0  0
    3.5652    0.1903    0.0000 C   0  0  0  0  0  0  0  0  0  0  0  0
    3.0132    0.8034    0.0000 C   0  0  0  0  0  0  0  0  0  0  0  0
    2.2062    0.6318    0.0000 C   0  0  0  0  0  0  0  0  0  0  0  0
    4.3621    0.4038    0.0000 Br  0  0  0  0  0  0  0  0  0  0  0  0
   -4.3621    1.4804    0.0000 Br  0  0  0  0  0  0  0  0  0  0  0  0
  1  2  2  0      
  2  3  1  0      
  3  4  2  0      
  4  5  1  0      
  5  6  2  0      
  6  1  1  0      
  3  7  1  0      
  7  8  1  0      
  8  9  2  0      
  9  4  1  0      
 10  9  1  1      
 10 11  1  0      
 11 12  1  0      
 12 13  1  0      
 13 14  1  0      
 14 15  1  0      
 15 10  1  0      
 12 16  1  1      
 16 17  2  0      
 17 18  1  0      
 18 19  1  0      
 19 20  2  0      
 20 16  1  0      
 15 21  2  0      
 19 22  1  0      
 22 23  2  0      
 23 24  1  0      
 24 25  2  0      
 25 20  1  0      
 23 26  1  0      
  1 27  1  0      
M  STY  1   1 SUP
M  SLB  1   1   1
M  SAL   1  1  27
M  SBL   1  1  31
M  SMT   1 rB
M  SBV   1 31   -8.6595   10.6172
M  END
