# Supplementary material for: Marine Derived Hamacanthins as Lead for the Development of Novel PDGFRβ Protein Kinase Inhibitors
Source: MDPI journal article supplement (doi:10.3390/md11093209), 2013-08-26
Supplement: s3 [file s3]

marinedrugs-11-03209-s002.mol
  corina  12171321493D 1   1.00000     0.00000 
CORINA 3.49 0023  12.04.2013
 27 31  0  0  0  0  0  0  0  0999 V2000
   -0.0166    1.3743    0.0096 C   0  0  0  0  0  0  0  0  0  0  0  0
    0.0021   -0.0041    0.0020 C   0  0  0  0  0  0  0  0  0  0  0  0
    1.2169   -0.6815   -0.0133 C   0  0  0  0  0  0  0  0  0  0  0  0
    2.4146    0.0517   -0.0208 C   0  0  0  0  0  0  0  0  0  0  0  0
    2.3811    1.4445   -0.0130 C   0  0  0  0  0  0  0  0  0  0  0  0
    1.1685    2.0976    0.0022 C   0  0  0  0  0  0  0  0  0  0  0  0
    1.5512   -2.0199   -0.0237 N   0  0  0  0  0  0  0  0  0  0  0  0
    2.9007   -2.1695   -0.0374 C   0  0  0  0  0  0  0  0  0  0  0  0
    3.4995   -0.9454   -0.0366 C   0  0  0  0  0  0  0  0  0  0  0  0
    4.9475   -0.6725   -0.0490 C   0  0  0  0  0  0  0  0  0  0  0  0
    5.3851    0.5540   -0.0471 N   0  0  0  0  0  0  0  0  0  0  0  0
    6.8204    0.8326   -0.0419 C   0  0  0  0  0  0  0  0  0  0  0  0
    7.5688   -0.2037   -0.8772 C   0  0  0  0  0  0  0  0  0  0  0  0
    7.1926   -1.5548   -0.4553 N   0  0  0  0  0  0  0  0  0  0  0  0
    5.9249   -1.7975   -0.0577 C   0  0  0  0  0  0  0  0  0  0  0  0
    7.0636    2.2048   -0.6156 C   0  0  0  0  0  0  0  0  0  0  0  0
    6.2245    2.9041   -1.3958 C   0  0  0  0  0  0  0  0  0  0  0  0
    6.7861    4.1086   -1.7225 N   0  0  0  0  0  0  0  0  0  0  0  0
    8.0318    4.2161   -1.1458 C   0  0  0  0  0  0  0  0  0  0  0  0
    8.2578    3.0310   -0.4225 C   0  0  0  0  0  0  0  0  0  0  0  0
    5.5877   -2.9121    0.2869 O   0  0  0  0  0  0  0  0  0  0  0  0
    9.0083    5.2069   -1.1534 C   0  0  0  0  0  0  0  0  0  0  0  0
   10.1837    5.0147   -0.4597 C   0  0  0  0  0  0  0  0  0  0  0  0
   10.4041    3.8400    0.2482 C   0  0  0  0  0  0  0  0  0  0  0  0
    9.4556    2.8571    0.2738 C   0  0  0  0  0  0  0  0  0  0  0  0
   11.5095    6.3631   -0.4723 Br  0  0  0  0  0  0  0  0  0  0  0  0
   -1.6719    2.2886    0.0224 Br  0  0  0  0  0  0  0  0  0  0  0  0
  1  2  2  0      
  2  3  1  0      
  3  4  2  0      
  4  5  1  0      
  5  6  2  0      
  6  1  1  0      
  3  7  1  0      
  7  8  1  0      
  8  9  2  0      
  9  4  1  0      
 10 11  2  0      
 11 12  1  0      
 12 13  1  0      
 13 14  1  0      
 14 15  1  0      
 15 10  1  0      
 12 16  1  0      
 16 17  2  0      
 17 18  1  0      
 18 19  1  0      
 19 20  2  0      
 20 16  1  0      
 15 21  2  0      
 19 22  1  0      
 22 23  2  0      
 23 24  1  0      
 24 25  2  0      
 25 20  1  0      
 23 26  1  0      
  9 10  1  0      
  1 27  1  0      
M  STY  1   1 SUP
M  SLB  1   1   1
M  SAL   1  1  27
M  SBL   1  1  31
M  SMT   1 rB
M  SBV   1 31   -8.6874   10.5120
M  END
$$$$
