# Supplementary material for: Marine Derived Hamacanthins as Lead for the Development of Novel PDGFRβ Protein Kinase Inhibitors
Source: MDPI journal article supplement (doi:10.3390/md11093209), 2013-08-26
Supplement: s5 [file s5]

marinedrugs-11-03209-s003.mol
  corina  12171321493D 1   1.00000     0.00000 
CORINA 3.49 0023  12.04.2013
 27 31  0  0  0  0  0  0  0  0999 V2000
   -0.0142    1.3733    0.1407 C   0  0  0  0  0  0  0  0  0  0  0  0
    0.0043   -0.0050    0.1242 C   0  0  0  0  0  0  0  0  0  0  0  0
    1.2208   -0.6794    0.0816 C   0  0  0  0  0  0  0  0  0  0  0  0
    2.4156    0.0591    0.0559 C   0  0  0  0  0  0  0  0  0  0  0  0
    2.3756    1.4521    0.0728 C   0  0  0  0  0  0  0  0  0  0  0  0
    1.1708    2.0968    0.1152 C   0  0  0  0  0  0  0  0  0  0  0  0
    1.5601   -2.0152    0.0564 N   0  0  0  0  0  0  0  0  0  0  0  0
    2.9152   -2.1566    0.0160 C   0  0  0  0  0  0  0  0  0  0  0  0
    3.5043   -0.9319    0.0133 C   0  0  0  0  0  0  0  0  0  0  0  0
    4.9537   -0.6498   -0.0259 C   0  0  0  0  0  0  0  0  0  0  0  0
    5.3911    0.5961   -0.0244 N   0  0  0  0  0  0  0  0  0  0  0  0
    6.7024    0.8579   -0.0542 C   0  0  0  0  0  0  0  0  0  0  0  0
    7.6328   -0.1538   -0.0873 C   0  0  0  0  0  0  0  0  0  0  0  0
    7.2413   -1.4572   -0.0905 N   0  0  0  0  0  0  0  0  0  0  0  0
    5.9232   -1.7518   -0.0608 C   0  0  0  0  0  0  0  0  0  0  0  0
    7.1619    2.2673   -0.0521 C   0  0  0  0  0  0  0  0  0  0  0  0
    6.3824    3.3723   -0.1384 C   0  0  0  0  0  0  0  0  0  0  0  0
    7.1636    4.4926   -0.0987 N   0  0  0  0  0  0  0  0  0  0  0  0
    8.4909    4.1413    0.0161 C   0  0  0  0  0  0  0  0  0  0  0  0
    8.5527    2.7378    0.0506 C   0  0  0  0  0  0  0  0  0  0  0  0
    5.5458   -2.9111   -0.0626 O   0  0  0  0  0  0  0  0  0  0  0  0
    9.6695    4.8770    0.0957 C   0  0  0  0  0  0  0  0  0  0  0  0
   10.8781    4.2237    0.2069 C   0  0  0  0  0  0  0  0  0  0  0  0
   10.9319    2.8363    0.2399 C   0  0  0  0  0  0  0  0  0  0  0  0
    9.7854    2.0962    0.1634 C   0  0  0  0  0  0  0  0  0  0  0  0
   12.4781    5.2258    0.3148 Br  0  0  0  0  0  0  0  0  0  0  0  0
   -1.6688    2.2874    0.1907 Br  0  0  0  0  0  0  0  0  0  0  0  0
  1  2  2  0      
  2  3  1  0      
  3  4  2  0      
  4  5  1  0      
  5  6  2  0      
  6  1  1  0      
  3  7  1  0      
  7  8  1  0      
  8  9  2  0      
  9  4  1  0      
 10 11  2  0      
 11 12  1  0      
 12 13  2  0      
 13 14  1  0      
 14 15  1  0      
 15 10  1  0      
 16 17  2  0      
 17 18  1  0      
 18 19  1  0      
 19 20  2  0      
 20 16  1  0      
 15 21  2  0      
 19 22  1  0      
 22 23  2  0      
 23 24  1  0      
 24 25  2  0      
 25 20  1  0      
 23 26  1  0      
  9 10  1  0      
 12 16  1  0      
  1 27  1  0      
M  STY  1   1 SUP
M  SLB  1   1   1
M  SAL   1  1  27
M  SBL   1  1  31
M  SMT   1 rB
M  SBV   1 31   -8.6874   10.5120
M  END
$$$$
