# Supplementary material for: Marine Derived Hamacanthins as Lead for the Development of Novel PDGFRβ Protein Kinase Inhibitors
Source: MDPI journal article supplement (doi:10.3390/md11093209), 2013-08-26
Supplement: s6 [file s6]

marinedrugs-11-03209-s003.mol
  ChemDraw12021317112D

 27 31  0  0  0  0  0  0  0  0999 V2000
   -3.6744    0.9626    0.0000 C   0  0  0  0  0  0  0  0  0  0  0  0
   -3.6744    0.1376    0.0000 C   0  0  0  0  0  0  0  0  0  0  0  0
   -2.9600   -0.2749    0.0000 C   0  0  0  0  0  0  0  0  0  0  0  0
   -2.2455    0.1376    0.0000 C   0  0  0  0  0  0  0  0  0  0  0  0
   -2.2455    0.9626    0.0000 C   0  0  0  0  0  0  0  0  0  0  0  0
   -2.9600    1.3751    0.0000 C   0  0  0  0  0  0  0  0  0  0  0  0
   -2.7885   -1.0819    0.0000 N   0  0  0  0  0  0  0  0  0  0  0  0
   -1.9680   -1.1681    0.0000 C   0  0  0  0  0  0  0  0  0  0  0  0
   -1.6324   -0.4144    0.0000 C   0  0  0  0  0  0  0  0  0  0  0  0
   -0.9179   -0.0019    0.0000 C   0  0  0  0  0  0  0  0  0  0  0  0
   -0.2035   -0.4144    0.0000 N   0  0  0  0  0  0  0  0  0  0  0  0
    0.5110   -0.0019    0.0000 C   0  0  0  0  0  0  0  0  0  0  0  0
    0.5110    0.8231    0.0000 C   0  0  0  0  0  0  0  0  0  0  0  0
   -0.2035    1.2356    0.0000 N   0  0  0  0  0  0  0  0  0  0  0  0
   -0.9179    0.8231    0.0000 C   0  0  0  0  0  0  0  0  0  0  0  0
    1.2255   -0.4144    0.0000 C   0  0  0  0  0  0  0  0  0  0  0  0
    1.3117   -1.2349    0.0000 C   0  0  0  0  0  0  0  0  0  0  0  0
    2.1187   -1.4064    0.0000 N   0  0  0  0  0  0  0  0  0  0  0  0
    2.5312   -0.6920    0.0000 C   0  0  0  0  0  0  0  0  0  0  0  0
    1.9791   -0.0789    0.0000 C   0  0  0  0  0  0  0  0  0  0  0  0
   -1.5013    1.4064    0.0000 O   0  0  0  0  0  0  0  0  0  0  0  0
    3.3382   -0.5204    0.0000 C   0  0  0  0  0  0  0  0  0  0  0  0
    3.5931    0.2642    0.0000 C   0  0  0  0  0  0  0  0  0  0  0  0
    3.0411    0.8773    0.0000 C   0  0  0  0  0  0  0  0  0  0  0  0
    2.2341    0.7058    0.0000 C   0  0  0  0  0  0  0  0  0  0  0  0
    4.3900    0.4777    0.0000 Br  0  0  0  0  0  0  0  0  0  0  0  0
   -4.3900    1.3751    0.0000 Br  0  0  0  0  0  0  0  0  0  0  0  0
  1  2  2  0      
  2  3  1  0      
  3  4  2  0      
  4  5  1  0      
  5  6  2  0      
  6  1  1  0      
  3  7  1  0      
  7  8  1  0      
  8  9  2  0      
  9  4  1  0      
 10 11  2  0      
 11 12  1  0      
 12 13  2  0      
 13 14  1  0      
 14 15  1  0      
 15 10  1  0      
 16 17  2  0      
 17 18  1  0      
 18 19  1  0      
 19 20  2  0      
 20 16  1  0      
 15 21  2  0      
 19 22  1  0      
 22 23  2  0      
 23 24  1  0      
 24 25  2  0      
 25 20  1  0      
 23 26  1  0      
  9 10  1  0      
 12 16  1  0      
  1 27  1  0      
M  STY  1   1 SUP
M  SLB  1   1   1
M  SAL   1  1  27
M  SBL   1  1  31
M  SMT   1 rB
M  SBV   1 31   -8.6874   10.5120
M  END
