# Supplementary material for: Marine Derived Hamacanthins as Lead for the Development of Novel PDGFRβ Protein Kinase Inhibitors
Source: MDPI journal article supplement (doi:10.3390/md11093209), 2013-08-26
Supplement: s7 [file s7]

marinedrugs-11-03209-s004.mol
  corina  12171321503D 1   1.00000     0.00000 
CORINA 3.49 0023  12.04.2013
 27 30  0  0  0  0  0  0  0  0999 V2000
   -0.0178    1.4581    0.0101 C   0  0  0  0  0  0  0  0  0  0  0  0
    0.0021   -0.0041    0.0020 C   0  0  0  0  0  0  0  0  0  0  0  0
    1.2986   -0.4360   -0.0127 C   0  0  0  0  0  0  0  0  0  0  0  0
    2.1633    0.8038   -0.0143 C   0  0  0  0  0  0  0  0  0  0  0  0
    1.2368    1.9422    0.0007 N   0  0  0  0  0  0  0  0  0  0  0  0
   -1.1934   -0.8783    0.0092 C   0  0  0  0  0  0  0  0  0  0  0  0
    1.7583   -1.8229   -0.0245 C   0  0  0  0  0  0  0  0  0  0  0  0
    1.7373   -2.6841   -1.0872 C   0  0  0  0  0  0  0  0  0  0  0  0
    2.2468   -3.8840   -0.7126 N   0  0  0  0  0  0  0  0  0  0  0  0
    2.6226   -3.8551    0.6149 C   0  0  0  0  0  0  0  0  0  0  0  0
    2.3430   -2.5700    1.1058 C   0  0  0  0  0  0  0  0  0  0  0  0
    3.1851   -4.8022    1.4648 C   0  0  0  0  0  0  0  0  0  0  0  0
    3.4560   -4.4752    2.7755 C   0  0  0  0  0  0  0  0  0  0  0  0
    3.1727   -3.2066    3.2605 C   0  0  0  0  0  0  0  0  0  0  0  0
    2.6236   -2.2524    2.4320 C   0  0  0  0  0  0  0  0  0  0  0  0
   -2.0477   -0.8842    1.1117 C   0  0  0  0  0  0  0  0  0  0  0  0
   -3.1644   -1.7021    1.1163 C   0  0  0  0  0  0  0  0  0  0  0  0
   -3.4346   -2.5179    0.0228 C   0  0  0  0  0  0  0  0  0  0  0  0
   -2.5838   -2.5140   -1.0774 C   0  0  0  0  0  0  0  0  0  0  0  0
   -1.4696   -1.6927   -1.0889 C   0  0  0  0  0  0  0  0  0  0  0  0
   -2.8498   -3.3134   -2.1449 O   0  0  0  0  0  0  0  0  0  0  0  0
   -3.9977   -1.7082    2.1911 O   0  0  0  0  0  0  0  0  0  0  0  0
   -1.9339   -3.2588   -3.2405 C   0  0  0  0  0  0  0  0  0  0  0  0
   -1.0261    2.1398    0.0187 O   0  0  0  0  0  0  0  0  0  0  0  0
   -3.6594   -0.8459    3.2792 C   0  0  0  0  0  0  0  0  0  0  0  0
   -4.5328   -3.3217    0.0296 O   0  0  0  0  0  0  0  0  0  0  0  0
   -5.7430   -2.7710   -0.4942 C   0  0  0  0  0  0  0  0  0  0  0  0
  1  2  1  0      
  2  3  2  0      
  3  4  1  0      
  4  5  1  0      
  5  1  1  0      
  2  6  1  0      
  7  3  1  0      
  7  8  2  0      
  8  9  1  0      
  9 10  1  0      
 10 11  2  0      
 11  7  1  0      
 10 12  1  0      
 12 13  2  0      
 13 14  1  0      
 14 15  2  0      
 15 11  1  0      
  6 16  1  0      
 16 17  2  0      
 17 18  1  0      
 18 19  2  0      
 19 20  1  0      
 20  6  2  0      
 19 21  1  0      
 17 22  1  0      
 21 23  1  0      
  1 24  2  0      
 22 25  1  0      
 18 26  1  0      
 26 27  1  0      
M  END
$$$$
