# Supplementary material for: Marine Derived Hamacanthins as Lead for the Development of Novel PDGFRβ Protein Kinase Inhibitors
Source: MDPI journal article supplement (doi:10.3390/md11093209), 2013-08-26
Supplement: s8 [file s8]

marinedrugs-11-03209-s004.mol
  ChemDraw12021317122D

 27 30  0  0  0  0  0  0  0  0999 V2000
   -0.6130    1.8853    0.0000 C   0  0  0  0  0  0  0  0  0  0  0  0
   -0.3578    1.1007    0.0000 C   0  0  0  0  0  0  0  0  0  0  0  0
    0.4672    1.1010    0.0000 C   0  0  0  0  0  0  0  0  0  0  0  0
    0.7219    1.8857    0.0000 C   0  0  0  0  0  0  0  0  0  0  0  0
    0.0543    2.3704    0.0000 N   0  0  0  0  0  0  0  0  0  0  0  0
   -0.7701    0.3861    0.0000 C   0  0  0  0  0  0  0  0  0  0  0  0
    0.8795    0.3861    0.0000 C   0  0  0  0  0  0  0  0  0  0  0  0
    0.6220   -0.3977    0.0000 C   0  0  0  0  0  0  0  0  0  0  0  0
    1.2879   -0.8847    0.0000 N   0  0  0  0  0  0  0  0  0  0  0  0
    1.9569   -0.4020    0.0000 C   0  0  0  0  0  0  0  0  0  0  0  0
    1.7045    0.3835    0.0000 C   0  0  0  0  0  0  0  0  0  0  0  0
    2.7633   -0.5761    0.0000 C   0  0  0  0  0  0  0  0  0  0  0  0
    3.3173    0.0352    0.0000 C   0  0  0  0  0  0  0  0  0  0  0  0
    3.0649    0.8206    0.0000 C   0  0  0  0  0  0  0  0  0  0  0  0
    2.2585    0.9948    0.0000 C   0  0  0  0  0  0  0  0  0  0  0  0
   -1.5899    0.4784    0.0000 C   0  0  0  0  0  0  0  0  0  0  0  0
   -2.0798   -0.1854    0.0000 C   0  0  0  0  0  0  0  0  0  0  0  0
   -1.7504   -0.9415    0.0000 C   0  0  0  0  0  0  0  0  0  0  0  0
   -0.9307   -1.0341    0.0000 C   0  0  0  0  0  0  0  0  0  0  0  0
   -0.4409   -0.3707    0.0000 C   0  0  0  0  0  0  0  0  0  0  0  0
   -0.5182   -1.7486    0.0000 O   0  0  0  0  0  0  0  0  0  0  0  0
   -2.9048   -0.1854    0.0000 O   0  0  0  0  0  0  0  0  0  0  0  0
    0.3068   -1.7486    0.0000 C   0  0  0  0  0  0  0  0  0  0  0  0
   -1.3275    2.2978    0.0000 O   0  0  0  0  0  0  0  0  0  0  0  0
   -3.3173   -0.8999    0.0000 C   0  0  0  0  0  0  0  0  0  0  0  0
   -2.1629   -1.6559    0.0000 O   0  0  0  0  0  0  0  0  0  0  0  0
   -1.7504   -2.3704    0.0000 C   0  0  0  0  0  0  0  0  0  0  0  0
  1  2  1  0      
  2  3  2  0      
  3  4  1  0      
  4  5  1  0      
  5  1  1  0      
  2  6  1  0      
  7  3  1  0      
  7  8  2  0      
  8  9  1  0      
  9 10  1  0      
 10 11  2  0      
 11  7  1  0      
 10 12  1  0      
 12 13  2  0      
 13 14  1  0      
 14 15  2  0      
 15 11  1  0      
  6 16  1  0      
 16 17  2  0      
 17 18  1  0      
 18 19  2  0      
 19 20  1  0      
 20  6  2  0      
 19 21  1  0      
 17 22  1  0      
 21 23  1  0      
  1 24  2  0      
 22 25  1  0      
 18 26  1  0      
 26 27  1  0      
M  END
