# Supplementary material for: Marine Derived Hamacanthins as Lead for the Development of Novel PDGFRβ Protein Kinase Inhibitors
Source: MDPI journal article supplement (doi:10.3390/md11093209), 2013-08-26
Supplement: s9 [file s9]

marinedrugs-11-03209-s005.mol
  corina  12171321503D 1   1.00000     0.00000 
CORINA 3.49 0023  12.04.2013
 28 31  0  0  0  0  0  0  0  0999 V2000
   -0.0291    1.4362    0.1075 C   0  0  0  0  0  0  0  0  0  0  0  0
    0.0164   -0.0270    0.0146 C   0  0  0  0  0  0  0  0  0  0  0  0
    1.1847   -0.6323   -0.0885 N   0  0  0  0  0  0  0  0  0  0  0  0
    2.3181    0.0748   -0.1086 C   0  0  0  0  0  0  0  0  0  0  0  0
    2.3058    1.4488   -0.0230 C   0  0  0  0  0  0  0  0  0  0  0  0
    1.1324    2.1256    0.0848 N   0  0  0  0  0  0  0  0  0  0  0  0
   -1.2350   -0.8165    0.0367 C   0  0  0  0  0  0  0  0  0  0  0  0
   -1.0958    2.0197    0.1985 O   0  0  0  0  0  0  0  0  0  0  0  0
   -1.2339   -2.1135    0.5518 C   0  0  0  0  0  0  0  0  0  0  0  0
   -2.4051   -2.8498    0.5714 C   0  0  0  0  0  0  0  0  0  0  0  0
   -3.5832   -2.2982    0.0778 C   0  0  0  0  0  0  0  0  0  0  0  0
   -3.5865   -1.0054   -0.4366 C   0  0  0  0  0  0  0  0  0  0  0  0
   -2.4191   -0.2630   -0.4521 C   0  0  0  0  0  0  0  0  0  0  0  0
   -2.4046   -4.1138    1.0732 O   0  0  0  0  0  0  0  0  0  0  0  0
   -4.7334   -3.0241    0.0977 O   0  0  0  0  0  0  0  0  0  0  0  0
   -4.7393   -0.4691   -0.9193 O   0  0  0  0  0  0  0  0  0  0  0  0
   -4.6702    0.8629   -1.4323 C   0  0  0  0  0  0  0  0  0  0  0  0
   -5.5517   -2.9113    1.2637 C   0  0  0  0  0  0  0  0  0  0  0  0
   -1.1600   -4.6171    1.5627 C   0  0  0  0  0  0  0  0  0  0  0  0
    3.6148   -0.6342   -0.2248 C   0  0  0  0  0  0  0  0  0  0  0  0
    4.8492   -0.0794   -0.1557 C   0  0  0  0  0  0  0  0  0  0  0  0
    5.7999   -1.0487   -0.3066 N   0  0  0  0  0  0  0  0  0  0  0  0
    5.2013   -2.2773   -0.4804 C   0  0  0  0  0  0  0  0  0  0  0  0
    3.8111   -2.0780   -0.4313 C   0  0  0  0  0  0  0  0  0  0  0  0
    5.6985   -3.5628   -0.6736 C   0  0  0  0  0  0  0  0  0  0  0  0
    4.8263   -4.6189   -0.8200 C   0  0  0  0  0  0  0  0  0  0  0  0
    3.4541   -4.4145   -0.7768 C   0  0  0  0  0  0  0  0  0  0  0  0
    2.9456   -3.1611   -0.5798 C   0  0  0  0  0  0  0  0  0  0  0  0
  1  2  1  0      
  2  3  2  0      
  3  4  1  0      
  4  5  2  0      
  5  6  1  0      
  6  1  1  0      
  2  7  1  0      
  1  8  2  0      
  7  9  1  0      
  9 10  2  0      
 10 11  1  0      
 11 12  2  0      
 12 13  1  0      
 13  7  2  0      
 10 14  1  0      
 11 15  1  0      
 12 16  1  0      
 16 17  1  0      
 15 18  1  0      
 14 19  1  0      
  4 20  1  0      
 20 21  2  0      
 21 22  1  0      
 22 23  1  0      
 23 24  2  0      
 24 20  1  0      
 23 25  1  0      
 25 26  2  0      
 26 27  1  0      
 27 28  2  0      
 28 24  1  0      
M  END
$$$$
