# Supplementary material for: Marine Derived Hamacanthins as Lead for the Development of Novel PDGFRβ Protein Kinase Inhibitors
Source: MDPI journal article supplement (doi:10.3390/md11093209), 2013-08-26
Supplement: s10 [file s10]

marinedrugs-11-03209-s005.mol
  ChemDraw12021317122D

 28 31  0  0  0  0  0  0  0  0999 V2000
   -0.4983    1.6500    0.0000 C   0  0  0  0  0  0  0  0  0  0  0  0
   -0.4983    0.8250    0.0000 C   0  0  0  0  0  0  0  0  0  0  0  0
    0.2162    0.4125    0.0000 N   0  0  0  0  0  0  0  0  0  0  0  0
    0.9306    0.8250    0.0000 C   0  0  0  0  0  0  0  0  0  0  0  0
    0.9306    1.6500    0.0000 C   0  0  0  0  0  0  0  0  0  0  0  0
    0.2162    2.0625    0.0000 N   0  0  0  0  0  0  0  0  0  0  0  0
   -1.2128    0.4125    0.0000 C   0  0  0  0  0  0  0  0  0  0  0  0
   -1.2128    2.0625    0.0000 O   0  0  0  0  0  0  0  0  0  0  0  0
   -1.9273    0.8250    0.0000 C   0  0  0  0  0  0  0  0  0  0  0  0
   -2.6417    0.4125    0.0000 C   0  0  0  0  0  0  0  0  0  0  0  0
   -2.6417   -0.4125    0.0000 C   0  0  0  0  0  0  0  0  0  0  0  0
   -1.9273   -0.8250    0.0000 C   0  0  0  0  0  0  0  0  0  0  0  0
   -1.2128   -0.4125    0.0000 C   0  0  0  0  0  0  0  0  0  0  0  0
   -3.3562    0.8250    0.0000 O   0  0  0  0  0  0  0  0  0  0  0  0
   -3.3562   -0.8250    0.0000 O   0  0  0  0  0  0  0  0  0  0  0  0
   -1.9273   -1.6500    0.0000 O   0  0  0  0  0  0  0  0  0  0  0  0
   -1.2128   -2.0625    0.0000 C   0  0  0  0  0  0  0  0  0  0  0  0
   -3.3562   -1.6500    0.0000 C   0  0  0  0  0  0  0  0  0  0  0  0
   -4.0707    0.4125    0.0000 C   0  0  0  0  0  0  0  0  0  0  0  0
    1.6451    0.4125    0.0000 C   0  0  0  0  0  0  0  0  0  0  0  0
    1.6451   -0.4125    0.0000 C   0  0  0  0  0  0  0  0  0  0  0  0
    2.4297   -0.6674    0.0000 N   0  0  0  0  0  0  0  0  0  0  0  0
    2.9146    0.0000    0.0000 C   0  0  0  0  0  0  0  0  0  0  0  0
    2.4297    0.6674    0.0000 C   0  0  0  0  0  0  0  0  0  0  0  0
    3.7351    0.0862    0.0000 C   0  0  0  0  0  0  0  0  0  0  0  0
    4.0707    0.8399    0.0000 C   0  0  0  0  0  0  0  0  0  0  0  0
    3.5858    1.5074    0.0000 C   0  0  0  0  0  0  0  0  0  0  0  0
    2.7653    1.4211    0.0000 C   0  0  0  0  0  0  0  0  0  0  0  0
  1  2  1  0      
  2  3  2  0      
  3  4  1  0      
  4  5  2  0      
  5  6  1  0      
  6  1  1  0      
  2  7  1  0      
  1  8  2  0      
  7  9  1  0      
  9 10  2  0      
 10 11  1  0      
 11 12  2  0      
 12 13  1  0      
 13  7  2  0      
 10 14  1  0      
 11 15  1  0      
 12 16  1  0      
 16 17  1  0      
 15 18  1  0      
 14 19  1  0      
  4 20  1  0      
 20 21  2  0      
 21 22  1  0      
 22 23  1  0      
 23 24  2  0      
 24 20  1  0      
 23 25  1  0      
 25 26  2  0      
 26 27  1  0      
 27 28  2  0      
 28 24  1  0      
M  END
